# Supplementary material for: A fractal structural feature related to dynamic crossover in metallic glass-forming liquids
Source: Royal Society of Chemistry journal article supplement (doi:10.1039/d2cp04840j), 2023-01-01
Supplement: d2cp04840j1.pdf [file d2cp04840j1.pdf]

**Supplementary material of “A fractal structural feature related to dynamic  
crossover in metallic glass-forming liquid”**

Wei Chu, Jinhua Yu, Nannan Ren, Zheng Wang\*, Lina Hu\*

\*Corresponding author. Email: [hulina0614@sdu.edu.cn](mailto:hulina0614@sdu.edu.cn) (L. Hu); [zheng.wang@sdu.edu.cn](mailto:zheng.wang@sdu.edu.cn) (Z. Wang).

**Supplementary Materials includes:**

Figures S1-S3

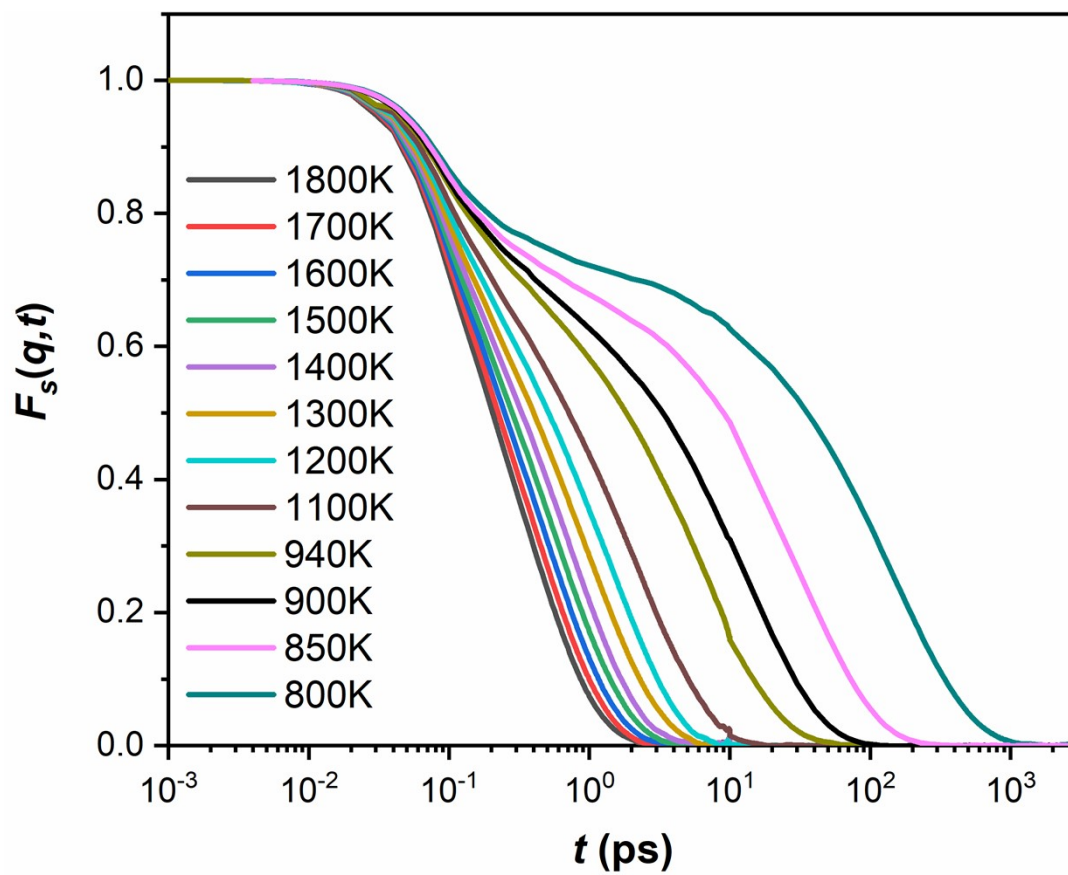

**Fig. S1** Self-intermediate scattering functions of all atoms at different temperatures under zero pressure ( $P=0$  GPa).

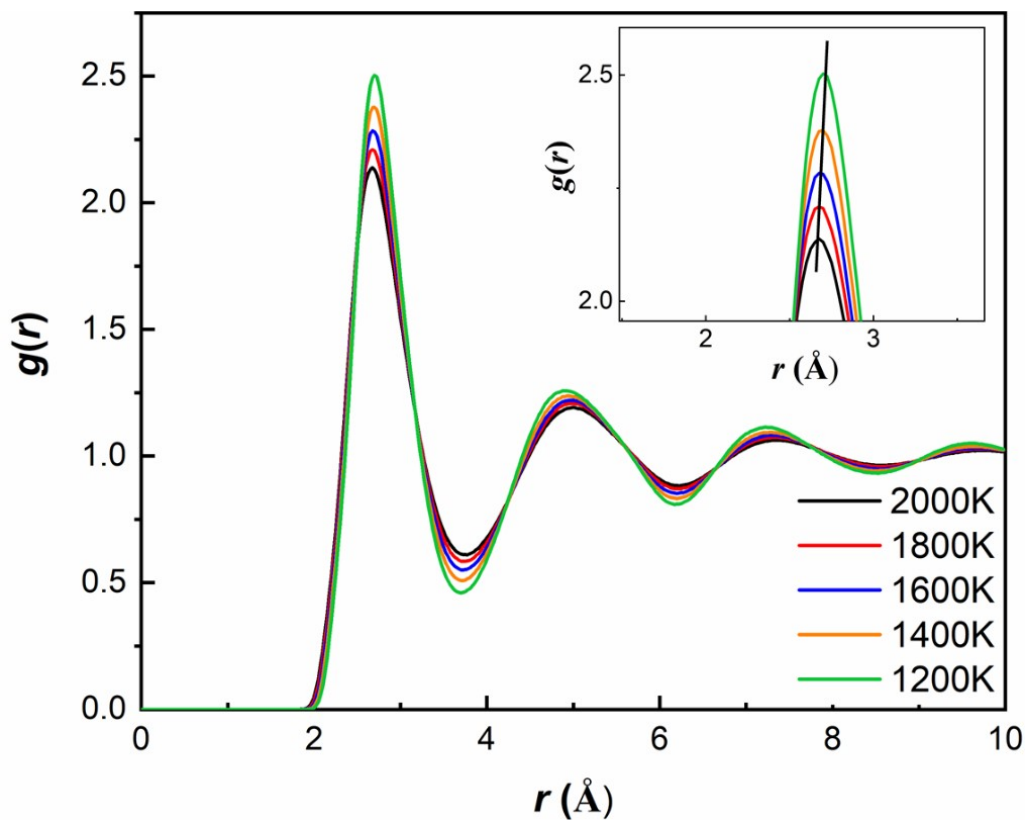

**Fig. S2** The total pair distribution functions at different temperatures during cooling (from 2000 K to 1200 K) for  $\text{Cu}_{50}\text{Zr}_{50}$  liquid. The inset shows the details of the first peaks at different temperatures. Unlike the first peak of PDFs below  $T_c$  (see Fig. 3(b)), it is obvious that the peak position of the first peak of PDFs is always changing upon cooling from higher temperatures.

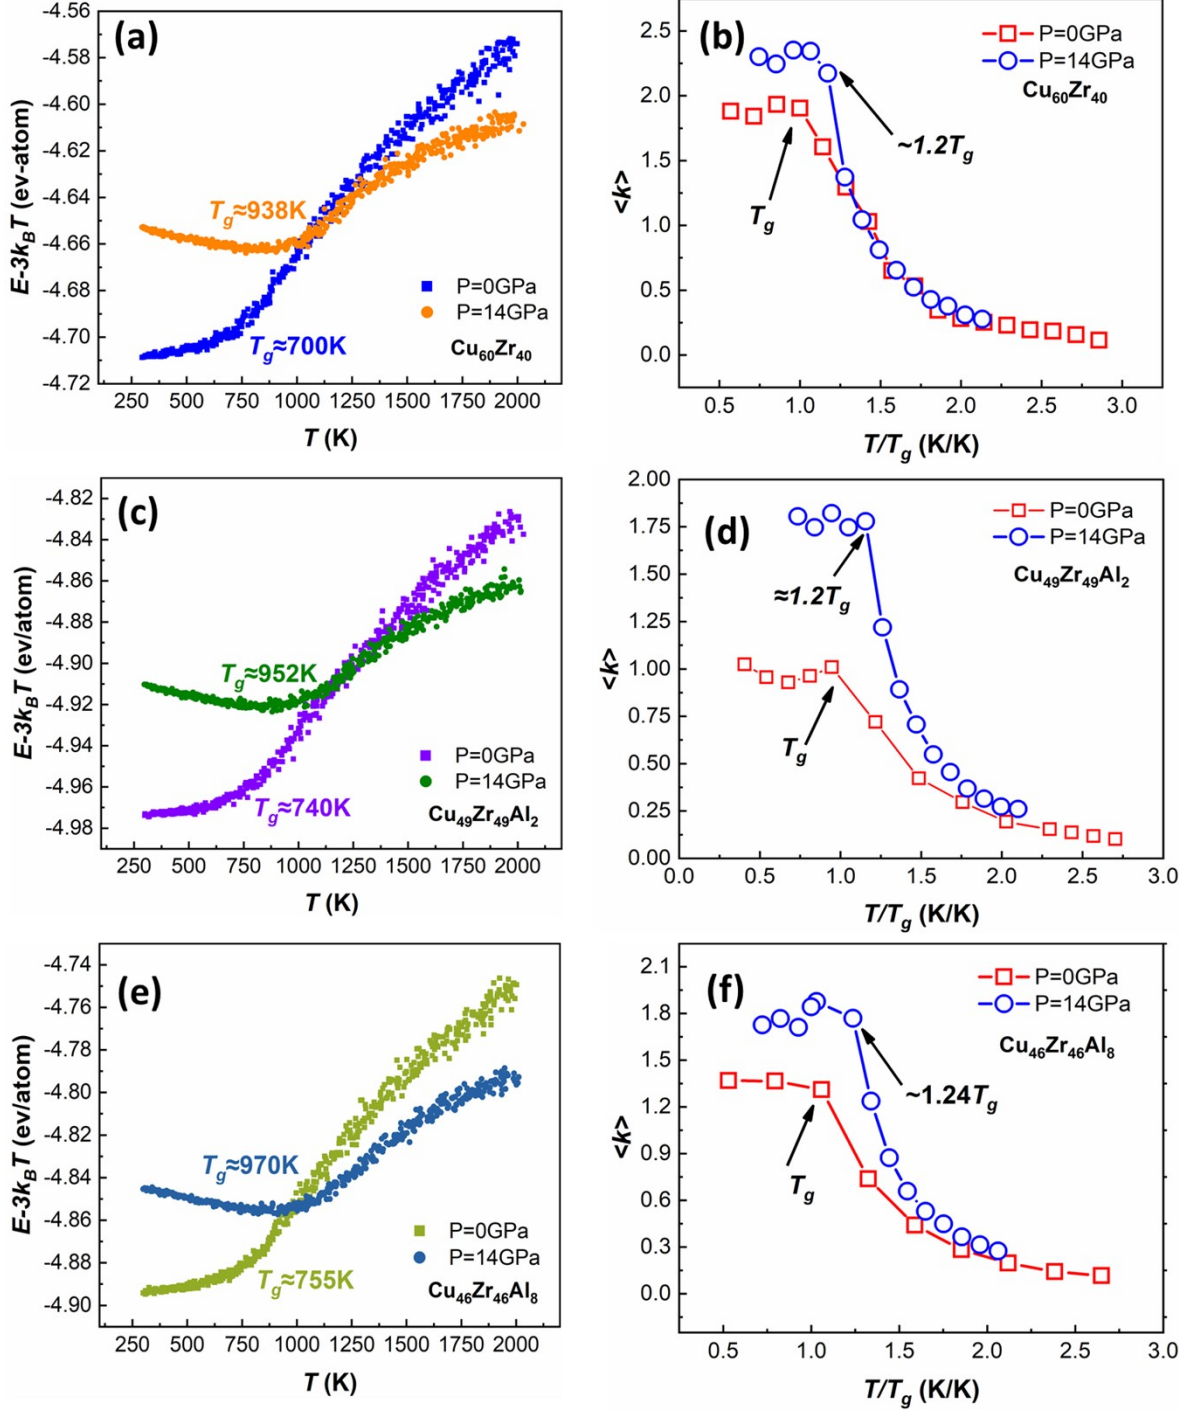

**Fig. S3** Temperature dependence of  $E-3k_B T$  upon quenching of (a)  $\text{Cu}_{60}\text{Zr}_{40}$ , (c)  $\text{Cu}_{49}\text{Zr}_{49}\text{Al}_2$ , (e)  $\text{Cu}_{46}\text{Zr}_{46}\text{Al}_8$  liquids at two external hydrostatic pressures. Temperature dependence of  $\langle k \rangle$  for (b)  $\text{Cu}_{60}\text{Zr}_{40}$ , (d)  $\text{Cu}_{49}\text{Zr}_{49}\text{Al}_2$ , (f)  $\text{Cu}_{46}\text{Zr}_{46}\text{Al}_8$  liquids under two pressure ( $P=0$  GPa and  $P=14$  GPa). A same fractal behavior like that in  $\text{Cu}_{50}\text{Zr}_{50}$  liquid is observed.
